# Supplementary material for: High epiregulin expression in human U87 glioma cells relies on IRE1α and promotes autocrine growth through EGF receptor
Source: PubMed Central journal article supplement (PMC3878670; doi:10.1186/1471-2407-13-597), 2013-12-13
Supplement: 1471-2407-13-597-S1.pdf [file 1471-2407-13-597-S1.pdf]

| <b>gene</b>       | <b>forward primer (5'-&gt;3')</b> | <b>reverse primer (5'-&gt;3')</b> |
|-------------------|-----------------------------------|-----------------------------------|
| $\beta$ -actin    | CGTACCACTGGCATCGTGAT              | GTGTTGGCGTACAGGTCTTT              |
| ErbB1             | CCACCAAATTAGCCTGGACA              | CGCGACCCTTAGGTATTCTG              |
| ErbB2             | AGGGAAAACACATCCCCCAA              | CGGACATGGTCTAAGAGGCA              |
| HPRT1             | CCAGACAAGTTTGTGTAGG               | TCCAAACTCAACTTGAAGTC              |
| Epiregulin        | GCTCTGACATGAATGGCTATTGT           | TGTTCACATCGGACACCAGTAT            |
| HB-EGF            | CCCTCCCCTGTATCCACG                | AGTGACTCTCAAAGGTCCAGA             |
| MIST1             | CGGACAAGAAGCTCTCCAAG              | CTGGACATGGTCAGGATGGT              |
| S16               | GTCACGTGGCCCAGATTTAT              | TCTCCTTCTTGGAAGCCTCA              |
| SPARC             | GAGAGCGCGCTCTGCCTGCCG             | CACCACCTCTGTCTCATCAGGC            |
| THBS1             | TGCCTGATGACAAGTTCCAAG             | CCAGAGTGGTCTTTCCGCTC              |
| $\alpha$ -tubulin | GAGTGCATCTCCATCC                  | TAGAGCTCCCAGCAGGCATT              |
| XBP1              | CTGGAACAGCAAGTGGTAGA              | CTCCTCCAGGCTGGCAGG                |
