# Supplementary material for: High epiregulin expression in human U87 glioma cells relies on IRE1α and promotes autocrine growth through EGF receptor
Source: PubMed Central journal article supplement (PMC3878670; doi:10.1186/1471-2407-13-597), 2013-12-13

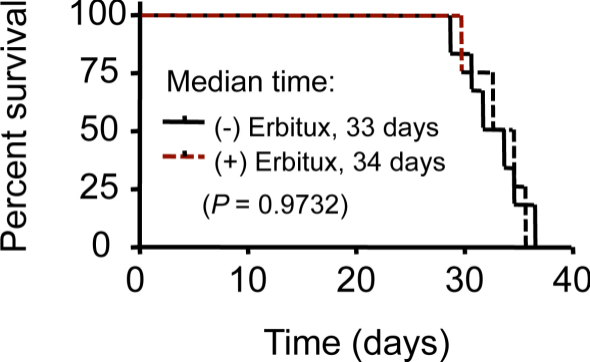

Supplement: 1471-2407-13-597-S2.pdf [file 1471-2407-13-597-S2.pdf]
